# Supplementary material for: Low dose naltrexone in multiple sclerosis: Effects on medication use. A quasi-experimental study
Source: PLOS journal article supplement (doi:10.1371/journal.pone.0187423), 2017-11-03
Supplement: S9 (10.1371/journal.pone.0187423.s009) [file journal.pone.0187423.s009]

**S5 Table. Interrupted time series, disease modifying MS agents, comparison of groups.**

|                               | Slope (x 10 <sup>-3</sup> ) (95% CI) |                  | p      | Intercept (95% CI) |                | p     |
|-------------------------------|--------------------------------------|------------------|--------|--------------------|----------------|-------|
| <b>LDN x 1 vs. LDN x 2-3</b>  | 34.2                                 | (14.3 to 54.0)   | 0.001  | -5.1               | (-13.5 to 3.3) | 0.234 |
| <b>LDN x 1 vs. LDN x 4+</b>   | -9.0                                 | (-22.7 to 4.6)   | 0.199  | -3.3               | (-9.0 to 2.5)  | 0.271 |
| <b>LDN x 2-3 vs. LDN x 4+</b> | -43.2                                | (-59.9 to -26.5) | <0.001 | 1.9                | (-5.2 to 9.0)  | 0.604 |

Difference in difference of slope (coefficient) and intercept two years before and two years after first low dose naltrexone (LDN) dispense. Sum of DDD/patient in 30 days intervals in three groups with different LDN exposure.
