# Supplementary material for: Low dose naltrexone in multiple sclerosis: Effects on medication use. A quasi-experimental study
Source: PLOS journal article supplement (doi:10.1371/journal.pone.0187423), 2017-11-03
Supplement: S10 (10.1371/journal.pone.0187423.s010) [file journal.pone.0187423.s010]

**S6 Table. 6: Interrupted time series, baclofen.**

|                  | Slope (x 10 <sup>-3</sup> ) (95% CI) |               | p     | Intercept (95% CI) |                  | p     |
|------------------|--------------------------------------|---------------|-------|--------------------|------------------|-------|
| <b>LDN x 1</b>   | -1.0                                 | (-3.1 to 1.1) | 0.371 | 0.40               | (-.50 to 1.29)   | 0.387 |
| <b>LDN x 2-3</b> | -0.9                                 | (-3.3 to 1.5) | 0.460 | 0.33               | (-0.67 to 1.35)  | 0.518 |
| <b>LDN x 4+</b>  | -1.4                                 | (-2.8 to 0.0) | 0.047 | -0.91              | (-1.50 to -0.32) | 0.003 |

Difference in slope (coefficient) and intercept two years before and two years after first low dose naltrexone (LDN) dispense. Sum of DDD/patient in 30 days intervals in three groups with different LDN exposure.
